# Supplementary material for: Enhanced electrochemical performance of sulfur cathodes with a water-soluble binder
Source: Royal Society of Chemistry journal article supplement (doi:10.1039/c4ra15303k), 2015-01-01
Supplement: c4ra15303k1.pdf [file c4ra15303k1.pdf]

Electronic Supplementary Information

## Enhanced Electrochemical Performance of Sulfur Cathodes with a Water-Soluble Binder

Jin Pan, Guiyin Xu, Bing Ding, Jinpeng Han, Hui Dou and Xiaogang Zhang\*

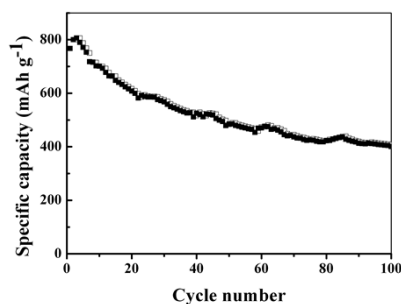

**Fig. S1** Cycle performance of AC-S composite with 5 wt%-PVDF binder at the current density of 0.5 C.

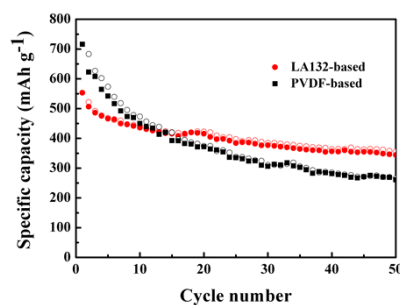

**Fig. S2** Cycle performances of the AC-S composite with 70 wt% S at the current density of 0.5 C with 10 wt% different binders.

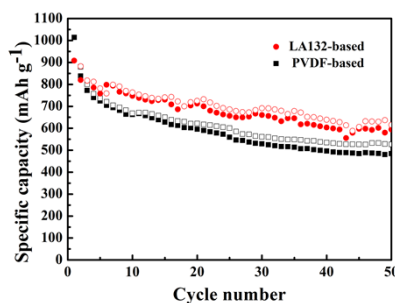

**Fig. S3** Cycle performances of the Ketjenblack-S composite with 70 wt% S at the current density of 0.5 C with 10 wt% different binders.

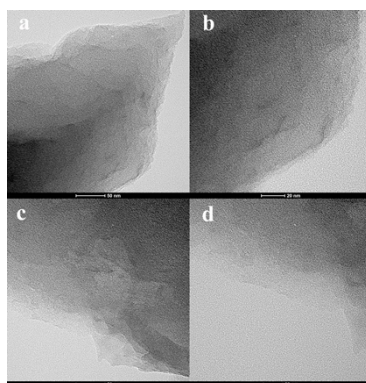

**Fig. S4** TEM images of the AC-S cathode with LA132 (a, b) before and (c, d) after 20 cycles.

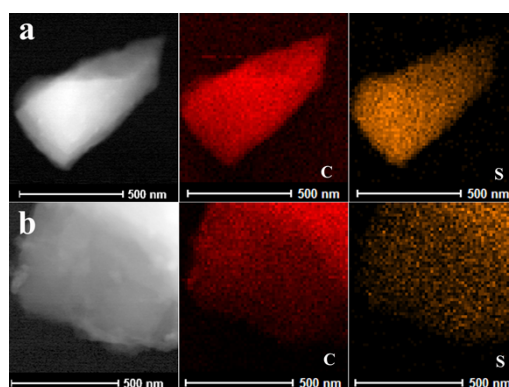

**Fig. S5** STEM images and corresponding mapping of carbon and sulfur elements across a selected area of the AC-S cathode with LA132 (a) before and (b) after 20 cycles.
